# Supplementary material for: Diabetes mellitus and other cardiovascular risk factors in lower-extremity peripheral artery disease versus coronary artery disease: an analysis of 1,121,359 cases from the nationwide databases
Source: Springer Nature journal article supplement (doi:10.1186/s12933-019-0955-5), 2019-11-15
Supplement: MOESM1 [file 17393494]

**Additional file 1: Table S1. Clinical profile compared to STEMI**

|        | Age (years)                         | Age $\geq$ 75 years         | Male sex                    | Smoking                     |
|--------|-------------------------------------|-----------------------------|-----------------------------|-----------------------------|
| STEMI  | 68.3 $\pm$ 12.8 (Ref)               | 34.3% (Ref)                 | 76.2% (Ref)                 | 39.3% (Ref)                 |
| NSTEMI | 69.8 $\pm$ 12.4 (+1.5 [1.4 to 1.6]) | 39.2% (1.23 [1.21 to 1.26]) | 75.6% (0.96 [0.94 to 0.98]) | 35.8% (0.86 [0.85 to 0.88]) |
| UA     | 70.6 $\pm$ 11.2 (+2.3 [2.2 to 2.3]) | 40.0% (1.28 [1.26 to 1.29]) | 73.7% (0.87 [0.86 to 0.88]) | 29.2% (0.64 [0.63 to 0.65]) |
| SA     | 70.7 $\pm$ 10.1 (+2.4 [2.3 to 2.4]) | 38.7% (1.21 [1.19 to 1.22]) | 75.1% (0.94 [0.93 to 0.95]) | 26.6% (0.56 [0.55 to 0.56]) |
| CLI    | 74.4 $\pm$ 10.1 (+6.1 [6.0 to 6.2]) | 52.3% (2.10 [2.06 to 2.15]) | 65.6% (0.59 [0.58 to 0.61]) | 26.5% (0.56 [0.54 to 0.57]) |
| IC     | 73.0 $\pm$ 8.7 (+4.6 [4.5 to 4.7])  | 45.2% (1.58 [1.55 to 1.60]) | 75.6% (0.96 [0.94 to 0.98]) | 37.9% (0.94 [0.93 to 0.96]) |

Data are mean  $\pm$  SD (difference versus STEMI [95% confidence interval]) for continuous variables and percentage (odds ratio versus STEMI [95% confidence interval]) for dichotomous variables. STEMI, ST-elevation myocardial infarction; NSTEMI, non-STEMI; UA, unstable angina pectoris; SA, stable angina; CLI, critical limb ischemia; IC, intermittent claudication.

**Additional file 1: Table S1. Clinical profile compared to STEMI (continued)**

|        | Hypertension                | Dyslipidemia                | Diabetes mellitus           | End-stage renal disease on dialysis |
|--------|-----------------------------|-----------------------------|-----------------------------|-------------------------------------|
| STEMI  | 66.0% (Ref)                 | 55.2% (Ref)                 | 34.6% (ref)                 | 2.0% (ref)                          |
| NSTEMI | 71.5% (1.29 [1.26 to 1.32]) | 59.3% (1.18 [1.16 to 1.20]) | 39.1% (1.22 [1.19 to 1.24]) | 4.3% (2.16 [2.05 to 2.27])          |
| UA     | 74.2% (1.48 [1.46 to 1.50]) | 62.1% (1.33 [1.31 to 1.34]) | 41.3% (1.33 [1.32 to 1.35]) | 6.9% (3.58 [3.46 to 3.70])          |
| SA     | 76.5% (1.67 [1.65 to 1.69]) | 64.1% (1.45 [1.43 to 1.46]) | 44.6% (1.52 [1.51 to 1.54]) | 6.8% (3.52 [3.41 to 3.63])          |
| CLI    | 73.0% (1.39 [1.36 to 1.43]) | 38.4% (0.51 [0.49 to 0.52]) | 65.5% (3.59 [3.52 to 3.67]) | 45.5% (40.1 [38.8 to 41.5])         |
| IC     | 80.7% (2.16 [2.11 to 2.21]) | 55.5% (1.01 [0.99 to 1.03]) | 52.7% (2.11 [2.07 to 2.15]) | 14.9% (8.41 [8.11 to 8.72])         |

Data are mean  $\pm$  SD (difference versus STEMI [95% confidence interval]) for continuous variables and percentage (odds ratio versus STEMI [95% confidence interval]) for dichotomous variables. STEMI, ST-elevation myocardial infarction; NSTEMI, non-STEMI; UA, unstable angina pectoris; SA, stable angina; CLI, critical limb ischemia; IC, intermittent claudication.

**Additional file 1: Table S2. Clinical profile in LE-PAD by vessel territories**

|     |    | Age (years)                     | Age ≥75 years               | Male sex                    | Smoking                     |
|-----|----|---------------------------------|-----------------------------|-----------------------------|-----------------------------|
| CLI | AI | 74.9±9.9 (-0.2 [-0.5 to 0.1])   | 53.6% (0.95 [0.90 to 1.01]) | 70.9% (1.51 [1.42 to 1.60]) | 35.2% (1.48 [1.39 to 1.57]) |
|     | FP | 75.1±10.0 (Ref)                 | 54.9% (Ref)                 | 61.8% (Ref)                 | 26.8% (Ref)                 |
|     | BK | 74.1±10.2 (-1.0 [-1.2 to -0.8]) | 51.2% (0.86 [0.83 to 0.90]) | 66.0% (1.20 [1.15 to 1.24]) | 23.7% (0.85 [0.82 to 0.89]) |
| IC  | AI | 72.6±8.6 (-0.8 [-0.9 to -0.6])  | 42.9% (0.84 [0.82 to 0.87]) | 82.3% (1.85 [1.78 to 1.92]) | 41.7% (1.29 [1.25 to 1.33]) |
|     | FP | 73.3±8.7 (Ref)                  | 47.1% (Ref)                 | 71.6% (Ref)                 | 35.6% (Ref)                 |

Data are mean ± SD (difference versus FP [95% confidence interval]) for continuous variables and percentage (odds ratio versus FP [95% confidence interval]) for dichotomous variables. LE-PAD, lower-extremity peripheral artery disease; CLI, critical limb ischemia; IC, intermittent claudication; AI, aortoiliac artery; FP, femoropopliteal artery; BK, below-the-knee artery.

**Additional file 1: Table S2. Clinical profile in LE-PAD by vessel territories (continued)**

|     |    | Hypertension                | Dyslipidemia                | Diabetes mellitus           | End-stage renal disease on dialysis |
|-----|----|-----------------------------|-----------------------------|-----------------------------|-------------------------------------|
| CLI | AI | 75.7% (1.04 [0.97 to 1.11]) | 41.6% (1.08 [1.02 to 1.14]) | 55.6% (0.65 [0.61 to 0.69]) | 27.4% (0.53 [0.50 to 0.56])         |
|     | FP | 74.9% (Ref)                 | 39.8% (Ref)                 | 65.9% (Ref)                 | 41.7% (Ref)                         |
|     | BK | 71.0% (0.82 [0.79 to 0.85]) | 36.3% (0.86 [0.83 to 0.89]) | 68.4% (1.12 [1.08 to 1.16]) | 54.6% (1.68 [1.62 to 1.74])         |
| IC  | AI | 79.9% (0.90 [0.86 to 0.93]) | 55.9% (1.03 [1.00 to 1.06]) | 46.4% (0.65 [0.63 to 0.67]) | 11.5% (0.61 [0.59 to 0.64])         |
|     | FP | 81.6% (Ref)                 | 55.1% (Ref)                 | 57.0% (ref)                 | 17.4% (ref)                         |

Data are mean ± SD (difference versus FP [95% confidence interval]) for continuous variables and percentage (odds ratio versus FP [95% confidence interval]) for dichotomous variables. LE-PAD, lower-extremity peripheral artery disease; CLI, critical limb ischemia; IC, intermittent claudication; AI, aortoiliac artery; FP, femoropopliteal artery; BK, below-the-knee artery.

**Additional file 1: Table S3. Association of cardiovascular risk factors with age**

|                                     | ACS                 | SA                  | CLI                 | IC                  |
|-------------------------------------|---------------------|---------------------|---------------------|---------------------|
| (Intercept)                         | 75.4 [75.4 to 75.5] | 74.9 [74.8 to 74.9] | 80.1 [79.9 to 80.4] | 75.4 [75.2 to 75.6] |
| Male sex                            | -5.9 [-5.9 to -5.8] | -3.9 [-4.0 to -3.9] | -2.7 [-2.9 to -2.5] | -0.5 [-0.6 to -0.3] |
| Smoking                             | -5.9 [-5.9 to -5.8] | -3.3 [-3.4 to -3.2] | -3.5 [-3.7 to -3.3] | -3.2 [-3.3 to -3.1] |
| Hypertension                        | +3.3 [3.2 to 3.4]   | +2.2 [2.1 to 2.2]   | +1.8 [1.6 to 2.0]   | +1.8 [1.6 to 1.9]   |
| Dyslipidemia                        | -3.1 [-3.2 to -3.0] | -2.3 [-2.4 to -2.3] | -1.2 [-1.4 to -1.0] | -1.2 [-1.3 to -1.1] |
| Diabetes mellitus                   | -0.1 [-0.2 to -0.0] | -0.7 [-0.7 to -0.6] | -2.9 [-3.1 to -2.7] | -1.9 [-2.0 to -1.7] |
| End-stage renal disease on dialysis | -1.4 [-1.6 to -1.3] | -2.8 [-2.9 to -2.7] | -4.2 [-4.4 to -4.0] | -4.2 [-4.4 to -4.1] |

Data are regression coefficients and their 95% confidence intervals, derived from multiple linear regression model in which age was entered as the dependent variable and cardiovascular risk factors (male sex, smoking, hypertension, dyslipidemia, diabetes mellitus, and end-stage renal disease on dialysis) as the dependent variables. ACS, acute coronary syndrome; SA, stable angina; CLI, critical limb ischemia; IC, intermittent claudication.

**Additional file 1: Table S4. Heterogeneity in clinical profile between CVDs.**

| Cardiovascular diseases |        | C statistic            |
|-------------------------|--------|------------------------|
| CAD                     | PAD    | 0.725 [0.723 to 0.726] |
| CAD                     | CLI    | 0.825 [0.823 to 0.827] |
| CAD                     | IC     | 0.673 [0.671 to 0.675] |
| CAD                     | CLI-AI | 0.755 [0.749 to 0.761] |
| CAD                     | CLI-FP | 0.821 [0.818 to 0.824] |
| CAD                     | CLI-BK | 0.860 [0.857 to 0.862] |
| CAD                     | IC-AI  | 0.665 [0.662 to 0.668] |
| CAD                     | IC-FP  | 0.695 [0.692 to 0.697] |
| PAD                     | ACS    | 0.740 [0.738 to 0.742] |
| PAD                     | STEMI  | 0.773 [0.771 to 0.775] |
| PAD                     | NSTEMI | 0.729 [0.726 to 0.731] |
| PAD                     | UA     | 0.713 [0.711 to 0.715] |
| PAD                     | SA     | 0.716 [0.714 to 0.717] |
| ACS                     | SA     | 0.595 [0.594 to 0.596] |
| ACS                     | CLI    | 0.833 [0.831 to 0.836] |
| ACS                     | IC     | 0.695 [0.693 to 0.697] |
| ACS                     | CLI-AI | 0.762 [0.756 to 0.768] |
| ACS                     | CLI-FP | 0.829 [0.827 to 0.832] |
| ACS                     | CLI-BK | 0.867 [0.865 to 0.870] |
| ACS                     | IC-AI  | 0.683 [0.680 to 0.686] |
| ACS                     | IC-FP  | 0.717 [0.714 to 0.719] |
| STEMI                   | NSTEMI | 0.567 [0.564 to 0.569] |
| STEMI                   | UA     | 0.621 [0.619 to 0.622] |
| STEMI                   | SA     | 0.651 [0.650 to 0.653] |
| STEMI                   | CLI    | 0.855 [0.853 to 0.857] |
| STEMI                   | IC     | 0.735 [0.733 to 0.737] |
| STEMI                   | CLI-AI | 0.787 [0.781 to 0.792] |
| STEMI                   | CLI-FP | 0.852 [0.849 to 0.854] |
| STEMI                   | CLI-BK | 0.886 [0.884 to 0.888] |
| STEMI                   | IC-AI  | 0.719 [0.716 to 0.722] |
| STEMI                   | IC-FP  | 0.756 [0.754 to 0.759] |
| NSTEMI                  | UA     | 0.560 [0.558 to 0.563] |
| NSTEMI                  | SA     | 0.591 [0.589 to 0.594] |
| NSTEMI                  | CLI    | 0.829 [0.826 to 0.831] |
| NSTEMI                  | IC     | 0.682 [0.679 to 0.685] |

(Continued)

|        |        |                        |
|--------|--------|------------------------|
| NSTEMI | CLI-AI | 0.752 [0.746 to 0.759] |
| NSTEMI | CLI-FP | 0.824 [0.820 to 0.827] |
| NSTEMI | CLI-BK | 0.864 [0.861 to 0.867] |
| NSTEMI | IC-AI  | 0.670 [0.667 to 0.674] |
| NSTEMI | IC-FP  | 0.704 [0.700 to 0.707] |
| UA     | SA     | 0.541 [0.540 to 0.543] |
| UA     | CLI    | 0.815 [0.813 to 0.817] |
| UA     | IC     | 0.662 [0.660 to 0.664] |
| UA     | CLI-AI | 0.743 [0.737 to 0.749] |
| UA     | CLI-FP | 0.810 [0.807 to 0.813] |
| UA     | CLI-BK | 0.850 [0.847 to 0.853] |
| UA     | IC-AI  | 0.658 [0.655 to 0.661] |
| UA     | IC-FP  | 0.681 [0.679 to 0.684] |
| SA     | CLI    | 0.820 [0.818 to 0.822] |
| SA     | IC     | 0.659 [0.657 to 0.662] |
| SA     | CLI-AI | 0.753 [0.747 to 0.759] |
| SA     | CLI-FP | 0.816 [0.813 to 0.819] |
| SA     | CLI-BK | 0.854 [0.851 to 0.856] |
| SA     | IC-AI  | 0.656 [0.653 to 0.659] |
| SA     | IC-FP  | 0.679 [0.677 to 0.682] |
| CLI    | IC     | 0.744 [0.741 to 0.747] |
| CLI    | IC-AI  | 0.785 [0.782 to 0.789] |
| CLI    | IC-FP  | 0.719 [0.716 to 0.723] |
| IC     | CLI-AI | 0.646 [0.639 to 0.654] |
| IC     | CLI-FP | 0.737 [0.733 to 0.741] |
| IC     | CLI-BK | 0.791 [0.788 to 0.794] |
| CLI-AI | CLI-FP | 0.623 [0.615 to 0.631] |
| CLI-AI | CLI-BK | 0.689 [0.682 to 0.697] |
| CLI-AI | IC-AI  | 0.685 [0.677 to 0.692] |
| CLI-AI | IC-FP  | 0.629 [0.622 to 0.637] |
| CLI-FP | IC-AI  | 0.782 [0.778 to 0.786] |
| CLI-FP | IC-FP  | 0.709 [0.705 to 0.714] |
| CLI-BK | IC-AI  | 0.828 [0.824 to 0.831] |
| CLI-BK | IC-FP  | 0.769 [0.765 to 0.772] |
| IC-AI  | IC-FP  | 0.612 [0.608 to 0.617] |

Data are C statistics [95% confidence intervals]. Some of the point estimates (but not 95% confidence intervals) are also illustrated in **Figure 3**. IC-AI and IC-FP indicate IC with AI and FP lesions undergoing EVT, whereas CLI-AI, CLI-FP, CLI-BK indicate CLI with AI, FP, and BK lesions undergoing EVT, respectively. CAD, coronary artery disease; PAD, peripheral artery disease; ACS, acute coronary syndrome; STEMI, ST-elevation myocardial infarction; NSTEMI, non-STEMI; UA, unstable angina; SA, stable angina; CLI, critical limb ischemia; IC, intermittent claudication, AI, aortoiliac artery; FP, femoropopliteal artery; BK, below-the-knee artery; EVT, endovascular therapy.

**Additional file 1: Table S5. Institution-adjusted clinical profile**

|         |         | Age (years)                               | Age ≥75 years                                | Male sex                                     | Smoking                                      |
|---------|---------|-------------------------------------------|----------------------------------------------|----------------------------------------------|----------------------------------------------|
| Model 1 | CAD     | 70.3 [70.2 to 70.4] (Ref)                 | 38.8% [38.4% to 39.1%] (Ref)                 | 74.8% [74.5% to 75.0%] (Ref)                 | 28.8% [28.0% to 29.7%] (Ref)                 |
|         | LE-PAD  | 73.6 [73.5 to 73.8] (+3.4 [3.3 to 3.4])   | 48.5% [48.0% to 49.0%] (1.49 [1.47 to 1.51]) | 71.7% [71.3% to 72.1%] (0.85 [0.84 to 0.87]) | 32.0% [31.1% to 33.0%] (1.16 [1.15 to 1.18]) |
| Model 2 | ACS     | 69.7 [69.6 to 69.8] (Ref)                 | 38.0% [37.6% to 38.4%] (Ref)                 | 74.8% [74.6% to 75.1%] (Ref)                 | 32.3% [31.4% to 33.3%] (Ref)                 |
|         | SA      | 71.0 [70.9 to 71.1] (+1.3 [1.3 to 1.4])   | 39.6% [39.3% to 40.0%] (1.07 [1.06 to 1.08]) | 74.7% [74.4% to 75.0%] (0.99 [0.98 to 1.00]) | 24.8% [24.0% to 25.6%] (0.69 [0.68 to 0.69]) |
|         | CLI     | 74.7 [74.5 to 74.8] (+5.0 [4.9 to 5.1])   | 53.3% [52.7% to 54.0%] (1.86 [1.82 to 1.90]) | 65.6% [65.0% to 66.1%] (0.64 [0.63 to 0.66]) | 23.7% [22.9% to 24.6%] (0.65 [0.64 to 0.67]) |
|         | IC      | 73.1 [73.0 to 73.2] (+3.5 [3.4 to 3.5])   | 45.8% [45.2% to 46.3%] (1.38 [1.35 to 1.40]) | 75.4% [75.0% to 75.8%] (1.03 [1.01 to 1.05]) | 36.7% [35.6% to 37.7%] (1.21 [1.19 to 1.23]) |
|         | STEMI   | 68.7 [68.6 to 68.8] (Ref)                 | 35.4% [35.0% to 35.8%] (Ref)                 | 75.6% [75.3% to 75.9%] (Ref)                 | 36.0% [35.0% to 37.0%] (Ref)                 |
| Model 3 | NSTEMI  | 70.2 [70.0 to 70.3] (+1.5 [1.4 to 1.6])   | 40.5% [40.0% to 41.1%] (1.24 [1.22 to 1.27]) | 74.8% [74.4% to 75.3%] (0.96 [0.94 to 0.98]) | 32.6% [31.6% to 33.6%] (0.86 [0.84 to 0.88]) |
|         | UA      | 70.7 [70.6 to 70.8] (+2.0 [1.9 to 2.1])   | 40.3% [39.9% to 40.7%] (1.23 [1.22 to 1.25]) | 73.8% [73.5% to 74.1%] (0.91 [0.90 to 0.92]) | 28.2% [27.3% to 29.1%] (0.70 [0.69 to 0.71]) |
|         | SA      | 71.0 [70.9 to 71.1] (+2.3 [2.2 to 2.4])   | 39.6% [39.2% to 40.0%] (1.20 [1.18 to 1.21]) | 74.7% [74.4% to 75.0%] (0.95 [0.94 to 0.97]) | 24.8% [24.0% to 25.6%] (0.59 [0.58 to 0.59]) |
|         | CLI     | 74.7 [74.5 to 74.8] (+6.0 [5.9 to 6.1])   | 53.3% [52.7% to 54.0%] (2.08 [2.04 to 2.13]) | 65.6% [65.0% to 66.1%] (0.61 [0.60 to 0.63]) | 23.8% [22.9% to 24.6%] (0.55 [0.54 to 0.57]) |
|         | IC      | 73.1 [73.0 to 73.2] (+4.5 [4.4 to 4.6])   | 45.8% [45.2% to 46.3%] (1.54 [1.51 to 1.57]) | 75.4% [75.0% to 75.8%] (0.99 [0.97 to 1.01]) | 36.7% [35.6% to 37.8%] (1.03 [1.01 to 1.05]) |
|         | Model 4 | CLI AI                                    | 75.0 [74.6 to 75.4] (-0.3 [-0.7 to 0.1])     | 53.8% [51.7% to 55.9%] (0.92 [0.85 to 1.00]) | 72.2% [70.5% to 73.9%] (1.62 [1.49 to 1.76]) |
| FP      |         | 75.3 [75.0 to 75.6] (Ref)                 | 55.8% [54.2% to 57.3%] (Ref)                 | 61.6% [60.3% to 63.0%] (Ref)                 | 25.3% [23.3% to 27.3%] (Ref)                 |
| BK      |         | 73.9 [73.6 to 74.2] (-1.4 [-1.6 to -1.1]) | 50.6% [49.1% to 52.2%] (0.81 [0.77 to 0.86]) | 69.4% [68.2% to 70.6%] (1.41 [1.34 to 1.49]) | 21.1% [19.4% to 23.0%] (0.79 [0.74 to 0.84]) |
| Model 5 | IC AI   | 72.3 [72.1 to 72.4] (-1.0 [-1.1 to -0.8]) | 41.3% [40.3% to 42.3%] (0.81 [0.78 to 0.84]) | 83.6% [83.0% to 84.3%] (2.05 [1.96 to 2.14]) | 41.5% [39.5% to 43.6%] (1.34 [1.29 to 1.40]) |
|         | FP      | 73.2 [73.0 to 73.4] (Ref)                 | 46.5% [45.6% to 47.5%] (Ref)                 | 71.4% [70.6% to 72.2%] (Ref)                 | 34.6% [32.7% to 36.5%] (Ref)                 |

Data are estimated means [95% confidence intervals] (difference [95% confidence intervals]) for continuous variables and estimated percentages (odds ratio [95% confidence interval]) for dichotomous variables.

**Additional file 1: Table S5. Institution-adjusted clinical profile (continued)**

|         |         | Hypertension                                 | Dyslipidemia                                 | Diabetes mellitus                            | End-stage renal disease on dialysis          |
|---------|---------|----------------------------------------------|----------------------------------------------|----------------------------------------------|----------------------------------------------|
| Model 1 | CAD     | 73.7% [73.1% to 74.2%] (Ref)                 | 61.8% [61.0% to 62.7%] (Ref)                 | 41.2% [40.8% to 41.6%] (Ref)                 | 3.8% [3.5% to 4.0%] (Ref)                    |
|         | LE-PAD  | 77.9% [77.3% to 78.5%] (1.26 [1.24 to 1.28]) | 49.3% [48.4% to 50.3%] (0.60 [0.59 to 0.61]) | 56.8% [56.3% to 57.3%] (1.88 [1.85 to 1.90]) | 16.0% [15.2% to 17.0%] (4.89 [4.79 to 4.98]) |
| Model 2 | ACS     | 70.3% [69.7% to 70.9%] (Ref)                 | 58.1% [57.3% to 59.0%] (Ref)                 | 37.8% [37.4% to 38.2%] (Ref)                 | 3.0% [2.8% to 3.2%] (Ref)                    |
|         | SA      | 77.5% [77.0% to 78.1%] (1.46 [1.44 to 1.47]) | 66.0% [65.2% to 66.8%] (1.40 [1.39 to 1.41]) | 45.2% [44.7% to 45.6%] (1.35 [1.34 to 1.37]) | 4.8% [4.5% to 5.1%] (1.65 [1.62 to 1.68])    |
|         | CLI     | 73.7% [73.0% to 74.4%] (1.18 [1.15 to 1.21]) | 40.0% [39.0% to 41.1%] (0.48 [0.47 to 0.49]) | 64.8% [64.2% to 65.4%] (3.03 [2.96 to 3.10]) | 29.3% [27.9% to 30.7%] (13.5 [13.2 to 13.9]) |
|         | IC      | 81.0% [80.4% to 81.5%] (1.80 [1.76 to 1.84]) | 55.5% [54.5% to 56.5%] (0.90 [0.88 to 0.92]) | 52.5% [51.9% to 53.0%] (1.81 [1.78 to 1.85]) | 9.4% [8.8% to 10.0%] (3.38 [3.29 to 3.48])   |
|         | STEMI   | 65.9% [65.2% to 66.6%] (Ref)                 | 54.4% [53.5% to 55.3%] (Ref)                 | 34.5% [34.0% to 34.9%] (Ref)                 | 1.4% [1.3% to 1.5%] (Ref)                    |
| Model 3 | NSTEMI  | 71.1% [70.3% to 71.8%] (1.27 [1.25 to 1.30]) | 58.1% [57.1% to 59.0%] (1.16 [1.14 to 1.18]) | 38.8% [38.3% to 39.4%] (1.21 [1.19 to 1.23]) | 2.9% [2.7% to 3.1%] (2.08 [1.98 to 2.18])    |
|         | UA      | 75.3% [74.7% to 75.8%] (1.57 [1.55 to 1.60]) | 62.8% [61.9% to 63.7%] (1.42 [1.40 to 1.43]) | 41.4% [41.0% to 41.9%] (1.35 [1.33 to 1.36]) | 4.9% [4.6% to 5.2%] (3.66 [3.54 to 3.79])    |
|         | SA      | 77.5% [77.0% to 78.0%] (1.78 [1.76 to 1.80]) | 66.0% [65.1% to 66.8%] (1.63 [1.61 to 1.64]) | 45.1% [44.7% to 45.6%] (1.56 [1.55 to 1.58]) | 4.8% [4.5% to 5.1%] (3.55 [3.44 to 3.66])    |
|         | CLI     | 73.7% [73.0% to 74.4%] (1.45 [1.41 to 1.49]) | 40.0% [39.0% to 41.1%] (0.56 [0.55 to 0.57]) | 64.8% [64.2% to 65.4%] (3.50 [3.42 to 3.59]) | 29.4% [28.0% to 30.8%] (29.4 [28.3 to 30.6]) |
|         | IC      | 81.0% [80.5% to 81.6%] (2.21 [2.16 to 2.26]) | 55.5% [54.5% to 56.5%] (1.05 [1.03 to 1.07]) | 52.5% [51.9% to 53.1%] (2.10 [2.06 to 2.14]) | 9.4% [8.9% to 10.0%] (7.35 [7.07 to 7.64])   |
|         | Model 4 | CLI AI                                       | 75.6% [73.6% to 77.5%] (0.93 [0.85 to 1.02]) | 41.1% [38.6% to 43.7%] (0.99 [0.91 to 1.07]) | 53.7% [51.6% to 55.9%] (0.59 [0.55 to 0.64]) |
| FP      |         | 76.9% [75.4% to 78.4%] (Ref)                 | 41.5% [39.3% to 43.7%] (Ref)                 | 66.2% [64.7% to 67.7%] (Ref)                 | 28.4% [26.3% to 30.7%] (Ref)                 |
| BK      |         | 72.1% [70.4% to 73.7%] (0.77 [0.73 to 0.82]) | 36.9% [34.8% to 39.0%] (0.83 [0.78 to 0.87]) | 68.9% [67.4% to 70.3%] (1.13 [1.07 to 1.19]) | 44.1% [41.5% to 46.8%] (1.99 [1.88 to 2.10]) |
| Model 5 | IC AI   | 79.9% [78.8% to 80.9%] (0.84 [0.81 to 0.88]) | 56.0% [54.3% to 57.7%] (1.01 [0.97 to 1.04]) | 45.0% [43.9% to 46.1%] (0.58 [0.56 to 0.60]) | 7.5% [6.8% to 8.2%] (0.53 [0.50 to 0.56])    |
|         | FP      | 82.5% [81.6% to 83.4%] (Ref)                 | 55.8% [54.2% to 57.4%] (Ref)                 | 58.4% [57.5% to 59.4%] (Ref)                 | 13.2% [12.1% to 14.3%] (Ref)                 |

Data are estimated means [95% confidence intervals] (difference [95% confidence intervals]) for continuous variables and estimated percentages (odds ratio [95% confidence interval]) for dichotomous variables.

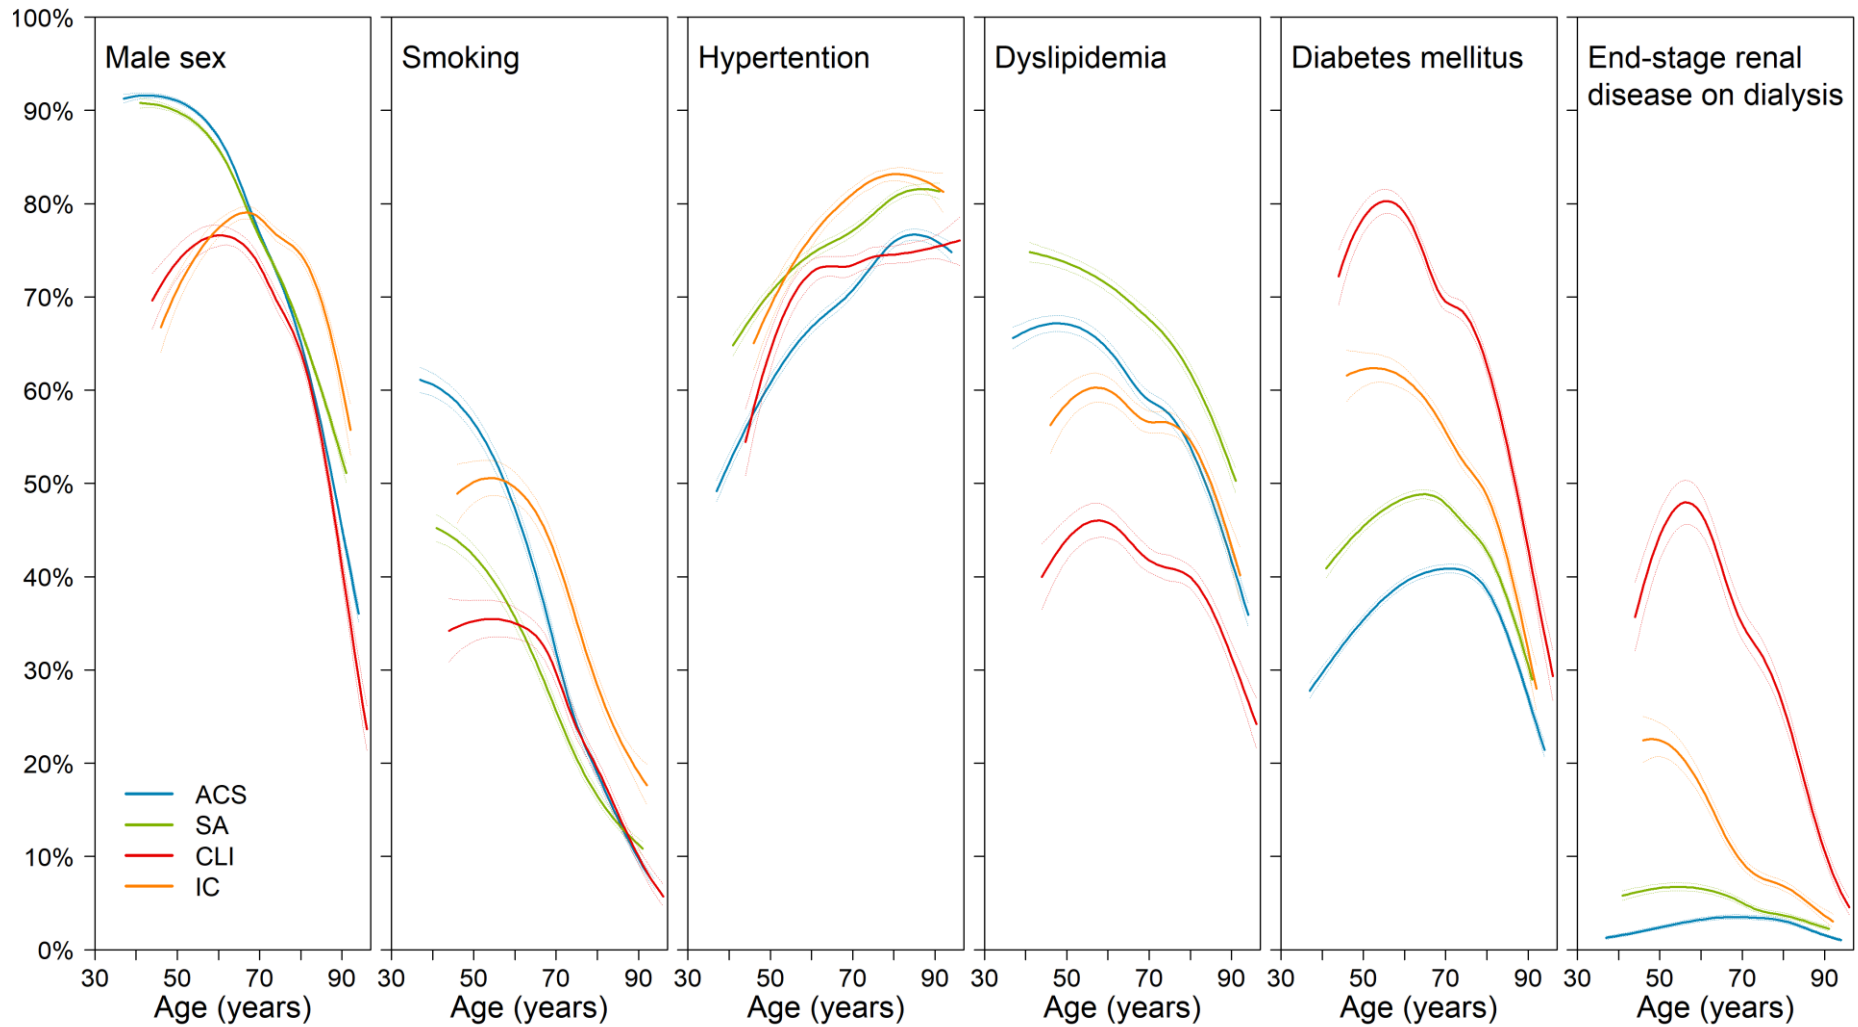

**Additional file 1: Figure S1. Institution-adjusted prevalence of cardiovascular risk factors by age.**

Solid lines and dotted lines represent estimates and their 95% CIs, corresponding to each age (mean-3SD to mean+3SD of age). ACS, acute coronary syndrome; SA, stable angina; CLI, critical limb ischemia; IC, intermittent claudication.

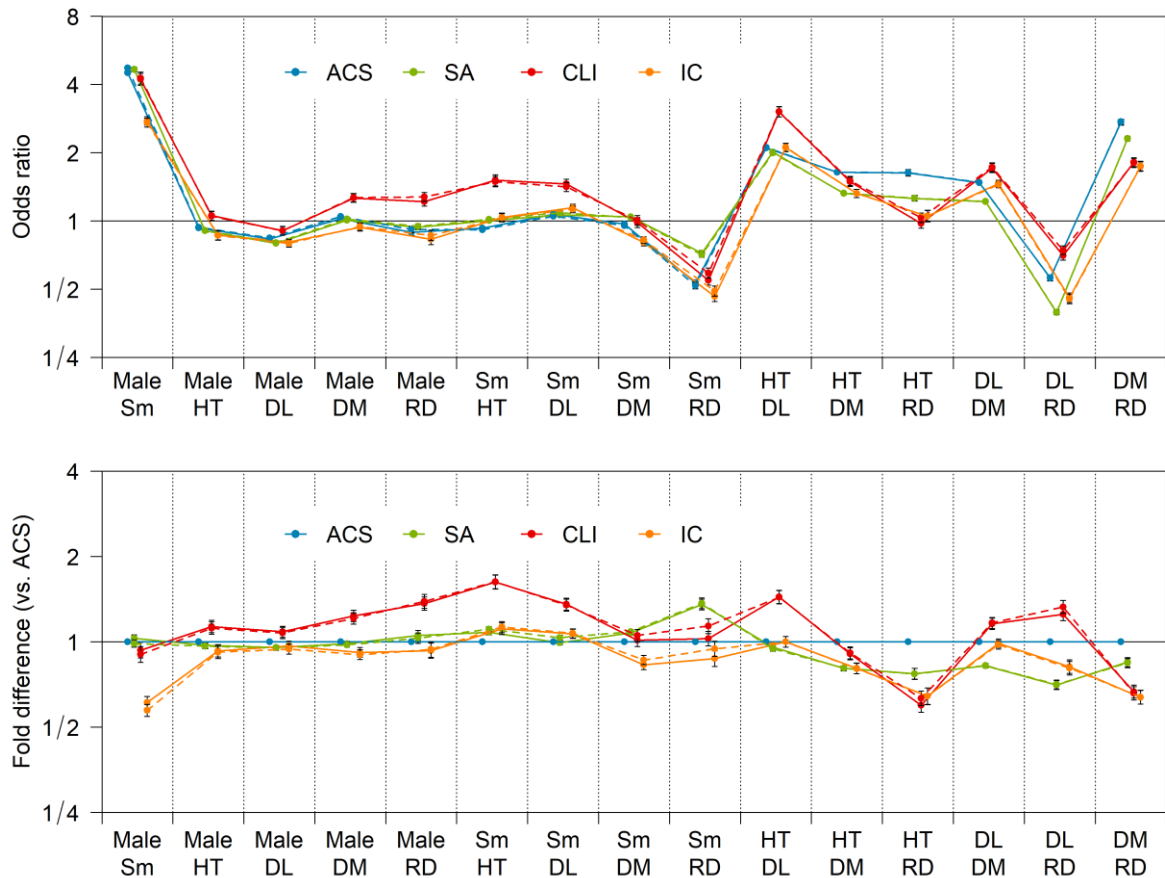

**Additional file 1: Figure S2. Likelihood of cardiovascular risk clustering with adjustment for age and institution.**

The upper panel shows the odds ratios of two arbitrary cardiovascular risk factors, quantifying the likelihood of the factors' clustering, whereas the lower panel shows their fold difference relative to ACS. Dots connected with solid lines indicates estimates calculated from the generalized linear mixed model with a logit-link function including a variable in the upper row as the dependent variable, another in the lower row and age as the fixed effects, and the inter-institution variability as the random effects. On the other hand, Dots connected with dotted lines indicates estimates calculated from the generalized linear mixed model with a logit-link function including a variable in the upper row as the dependent variable, another in the lower row and age as the fixed effects, and the inter-institution variability as the random effects. Note that both estimates were close to each other. Error bars represent 95% confidence intervals. ACS, acute coronary syndrome; SA, stable angina; CLI, critical limb ischemia; IC, intermittent claudication; DL, dyslipidemia; DM, diabetes mellitus; HT, hypertension; Male, male sex; RD, end-stage renal disease on dialysis; Sm, smoking.

**Additional file 1: Table S6. Institution-adjusted association of cardiovascular risk factors with age**

|                                     | ACS                 | SA                  | CLI                 | IC                  |
|-------------------------------------|---------------------|---------------------|---------------------|---------------------|
| (Intercept)                         | 75.7 [75.6 to 75.8] | 75.2 [75.1 to 75.3] | 80.1 [79.9 to 80.4] | 75.5 [75.2 to 75.8] |
| Male sex                            | -5.7 [-5.8 to -5.6] | -3.7 [-3.8 to -3.7] | -2.6 [-2.8 to -2.3] | -0.4 [-0.6 to -0.2] |
| Smoking                             | -6.0 [-6.1 to -6.0] | -3.6 [-3.7 to -3.5] | -3.6 [-3.8 to -3.4] | -3.4 [-3.6 to -3.2] |
| Hypertension                        | 3.2 [3.2 to 3.3]    | 2.1 [2.0 to 2.1]    | 1.7 [1.5 to 1.9]    | 1.7 [1.5 to 1.9]    |
| Dyslipidemia                        | -3.2 [-3.3 to -3.1] | -2.4 [-2.5 to -2.4] | -1.3 [-1.5 to -1.1] | -1.2 [-1.4 to -1.1] |
| Diabetes mellitus                   | -0.1 [-0.2 to -0.1] | -0.7 [-0.7 to -0.6] | -2.8 [-3.1 to -2.6] | -1.9 [-2.0 to -1.7] |
| End-stage renal disease on dialysis | -1.4 [-1.6 to -1.3] | -2.9 [-3.0 to -2.8] | -4.2 [-4.5 to -4.0] | -4.2 [-4.5 to -4.0] |

Data are regression coefficients and their 95% confidence intervals, derived from the generalized linear mixed model including age as the dependent variable, cardiovascular risk factors (male sex, smoking, hypertension, dyslipidemia, diabetes mellitus, and end-stage renal disease on dialysis) as the fixed effects, and the inter-institution variability as the mixed effects. ACS, acute coronary syndrome; SA, stable angina; CLI, critical limb ischemia; IC, intermittent claudication.



**Additional file 1: Table S7. Institution-adjusted heterogeneity in clinical profile between CVDs.**

| Cardiovascular diseases |        | C statistic            |
|-------------------------|--------|------------------------|
| CAD                     | PAD    | 0.725 [0.723 to 0.726] |
| CAD                     | CLI    | 0.825 [0.823 to 0.827] |
| CAD                     | IC     | 0.673 [0.671 to 0.675] |
| CAD                     | CLI-AI | 0.754 [0.748 to 0.760] |
| CAD                     | CLI-FP | 0.821 [0.818 to 0.824] |
| CAD                     | CLI-BK | 0.859 [0.857 to 0.862] |
| CAD                     | IC-AI  | 0.665 [0.661 to 0.668] |
| CAD                     | IC-FP  | 0.694 [0.692 to 0.697] |
| PAD                     | ACS    | 0.740 [0.739 to 0.742] |
| PAD                     | STEMI  | 0.773 [0.771 to 0.775] |
| PAD                     | NSTEMI | 0.729 [0.726 to 0.731] |
| PAD                     | UA     | 0.712 [0.710 to 0.714] |
| PAD                     | SA     | 0.715 [0.714 to 0.717] |
| ACS                     | SA     | 0.595 [0.594 to 0.596] |
| ACS                     | CLI    | 0.833 [0.831 to 0.835] |
| ACS                     | IC     | 0.695 [0.693 to 0.697] |
| ACS                     | CLI-AI | 0.762 [0.756 to 0.768] |
| ACS                     | CLI-FP | 0.829 [0.826 to 0.832] |
| ACS                     | CLI-BK | 0.867 [0.865 to 0.870] |
| ACS                     | IC-AI  | 0.683 [0.680 to 0.686] |
| ACS                     | IC-FP  | 0.717 [0.714 to 0.719] |
| STEMI                   | NSTEMI | 0.567 [0.564 to 0.569] |
| STEMI                   | UA     | 0.619 [0.618 to 0.621] |
| STEMI                   | SA     | 0.650 [0.649 to 0.652] |
| STEMI                   | CLI    | 0.855 [0.853 to 0.857] |
| STEMI                   | IC     | 0.735 [0.733 to 0.737] |
| STEMI                   | CLI-AI | 0.786 [0.781 to 0.792] |
| STEMI                   | CLI-FP | 0.851 [0.849 to 0.854] |
| STEMI                   | CLI-BK | 0.886 [0.883 to 0.888] |
| STEMI                   | IC-AI  | 0.720 [0.716 to 0.723] |
| STEMI                   | IC-FP  | 0.756 [0.754 to 0.759] |
| NSTEMI                  | UA     | 0.557 [0.555 to 0.560] |
| NSTEMI                  | SA     | 0.590 [0.588 to 0.593] |
| NSTEMI                  | CLI    | 0.828 [0.826 to 0.831] |
| NSTEMI                  | IC     | 0.682 [0.679 to 0.685] |

(Continued)

|        |        |                        |
|--------|--------|------------------------|
| NSTEMI | CLI-AI | 0.752 [0.745 to 0.758] |
| NSTEMI | CLI-FP | 0.823 [0.820 to 0.826] |
| NSTEMI | CLI-BK | 0.864 [0.861 to 0.867] |
| NSTEMI | IC-AI  | 0.671 [0.667 to 0.675] |
| NSTEMI | IC-FP  | 0.704 [0.701 to 0.707] |
| UA     | SA     | 0.540 [0.539 to 0.542] |
| UA     | CLI    | 0.814 [0.812 to 0.817] |
| UA     | IC     | 0.662 [0.659 to 0.664] |
| UA     | CLI-AI | 0.742 [0.736 to 0.749] |
| UA     | CLI-FP | 0.809 [0.806 to 0.812] |
| UA     | CLI-BK | 0.850 [0.847 to 0.852] |
| UA     | IC-AI  | 0.658 [0.655 to 0.661] |
| UA     | IC-FP  | 0.681 [0.678 to 0.683] |
| SA     | CLI    | 0.820 [0.818 to 0.822] |
| SA     | IC     | 0.658 [0.656 to 0.661] |
| SA     | CLI-AI | 0.752 [0.746 to 0.758] |
| SA     | CLI-FP | 0.816 [0.813 to 0.818] |
| SA     | CLI-BK | 0.854 [0.851 to 0.856] |
| SA     | IC-AI  | 0.655 [0.652 to 0.658] |
| SA     | IC-FP  | 0.678 [0.676 to 0.681] |
| CLI    | IC     | 0.743 [0.740 to 0.746] |
| CLI    | IC-AI  | 0.785 [0.781 to 0.788] |
| CLI    | IC-FP  | 0.718 [0.715 to 0.721] |
| IC     | CLI-AI | 0.644 [0.637 to 0.652] |
| IC     | CLI-FP | 0.736 [0.732 to 0.740] |
| IC     | CLI-BK | 0.790 [0.787 to 0.793] |
| CLI-AI | CLI-FP | 0.623 [0.615 to 0.631] |
| CLI-AI | CLI-BK | 0.689 [0.682 to 0.696] |
| CLI-AI | IC-AI  | 0.684 [0.676 to 0.691] |
| CLI-AI | IC-FP  | 0.626 [0.619 to 0.634] |
| CLI-FP | IC-AI  | 0.781 [0.777 to 0.785] |
| CLI-FP | IC-FP  | 0.708 [0.704 to 0.713] |
| CLI-BK | IC-AI  | 0.827 [0.823 to 0.830] |
| CLI-BK | IC-FP  | 0.767 [0.764 to 0.771] |
| IC-AI  | IC-FP  | 0.612 [0.608 to 0.617] |

Data are *C* statistics [95% confidence intervals]. IC-AI and IC-FP indicate IC with AI and FP lesions undergoing endovascular therapy, whereas CLI-AI, CLI-FP, CLI-BK indicate CLI with AI, FP, and BK lesions undergoing endovascular therapy, respectively. CAD, coronary artery disease; PAD, peripheral artery disease; ACS, acute coronary syndrome; STEMI, ST-elevation myocardial infarction; NSTEMI, non-STEMI; UA, unstable angina; SA, stable angina; CLI, critical limb ischemia; IC, intermittent claudication, AI, aortoiliac artery; FP, femoropopliteal artery; BK, below-the-knee artery.
